# Supplementary material for: Chromatin Dynamics and the RNA Exosome Function in Concert to Regulate Transcriptional Homeostasis
Source: PubMed Central journal article supplement (PMC4662874; doi:10.1016/j.celrep.2015.10.030), 2015-11-12
Supplement: NIHMS731410-supplement-1.pdf [file NIHMS731410-supplement-1.pdf]

## **SUPPLEMENTAL INVENTORY:**

### **Supplemental Figures, Data and Legends, S1-S6**

**Supplemental Data S1: Tiling array screenshots of different types of transcripts observed, related to Figures 2, 4**

**Supplemental Data S2: qRT-PCR confirmation of yeast tiling array data, related to Figure 2**

**Table S1: Summary of differential gene expression analysis, related to Figures 1, 2 and 4.**

**Table S2: Transcript annotation, related to Figures 2 and 4.**

**Table S3: SWR1 repressed transcript annotation and characteristics, related to Figure 4.**

**Table S4: Heatmap order and group definition, related to Figures 2 and 4.**

### **Supplemental Information**

**Supplemental Experimental Procedures**

**Supplemental References**
