# Supplementary material for: Chromatin Dynamics and the RNA Exosome Function in Concert to Regulate Transcriptional Homeostasis
Source: PubMed Central journal article supplement (PMC4662874; doi:10.1016/j.celrep.2015.10.030), 2015-11-12
Supplement: NIHMS731410-supplement-3.pdf [file NIHMS731410-supplement-3.pdf]

A)

SRTs up in *swr1* $\Delta$  *rrp6* $\Delta$ 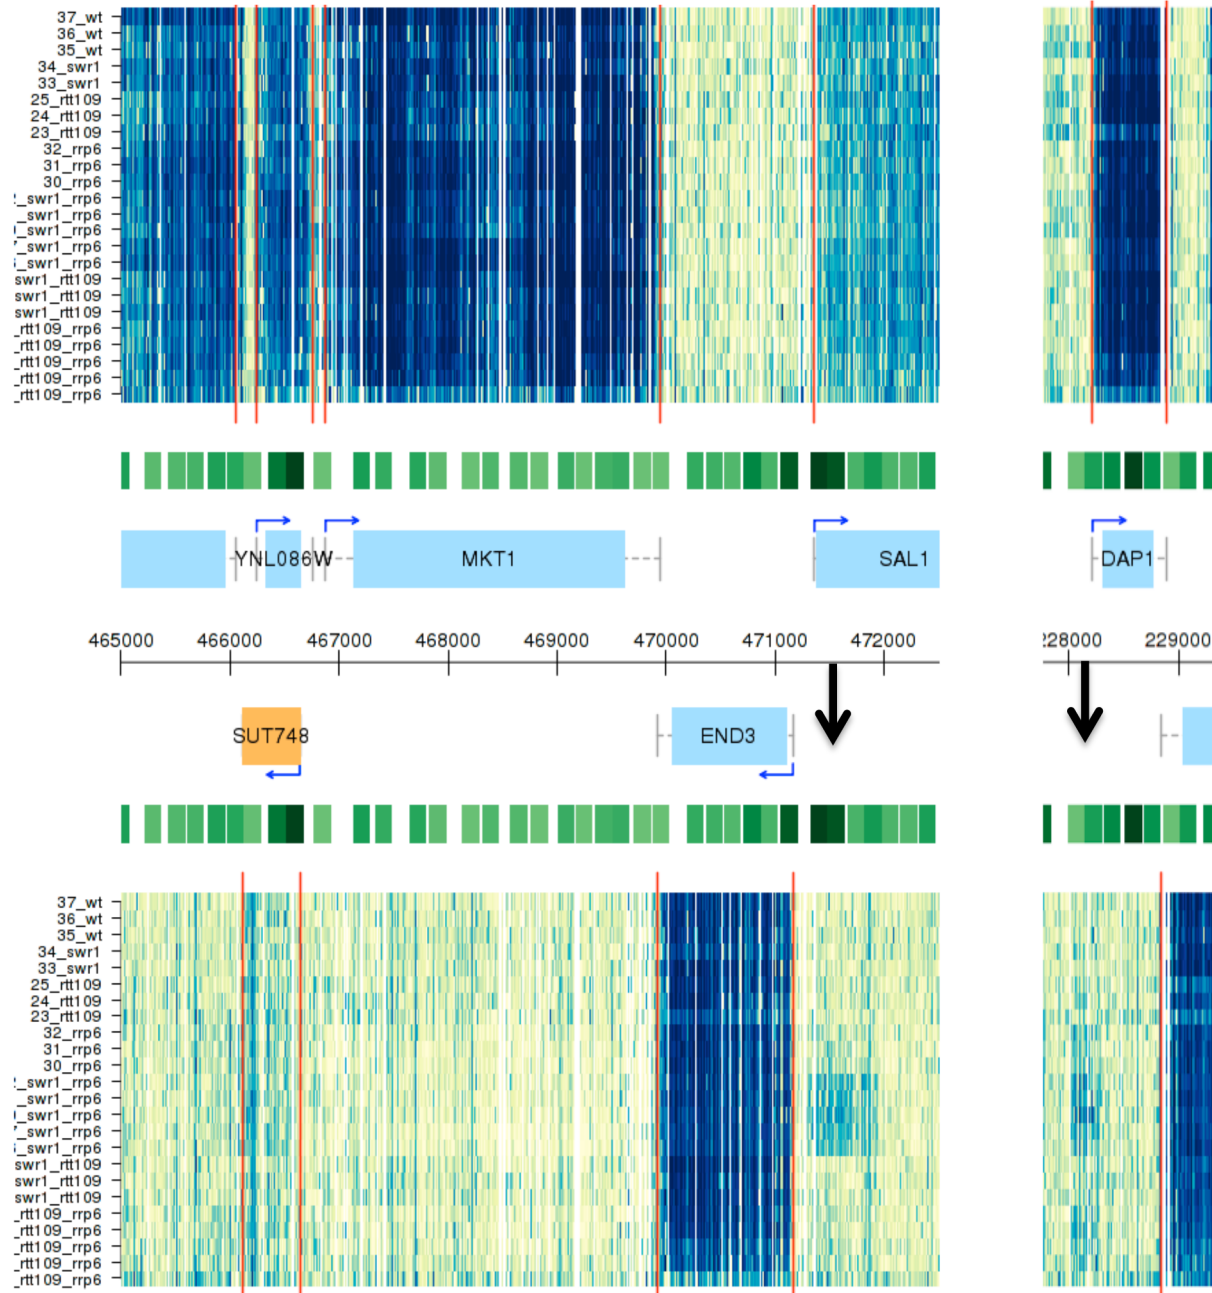

B)

## SWR-C repressed transcripts

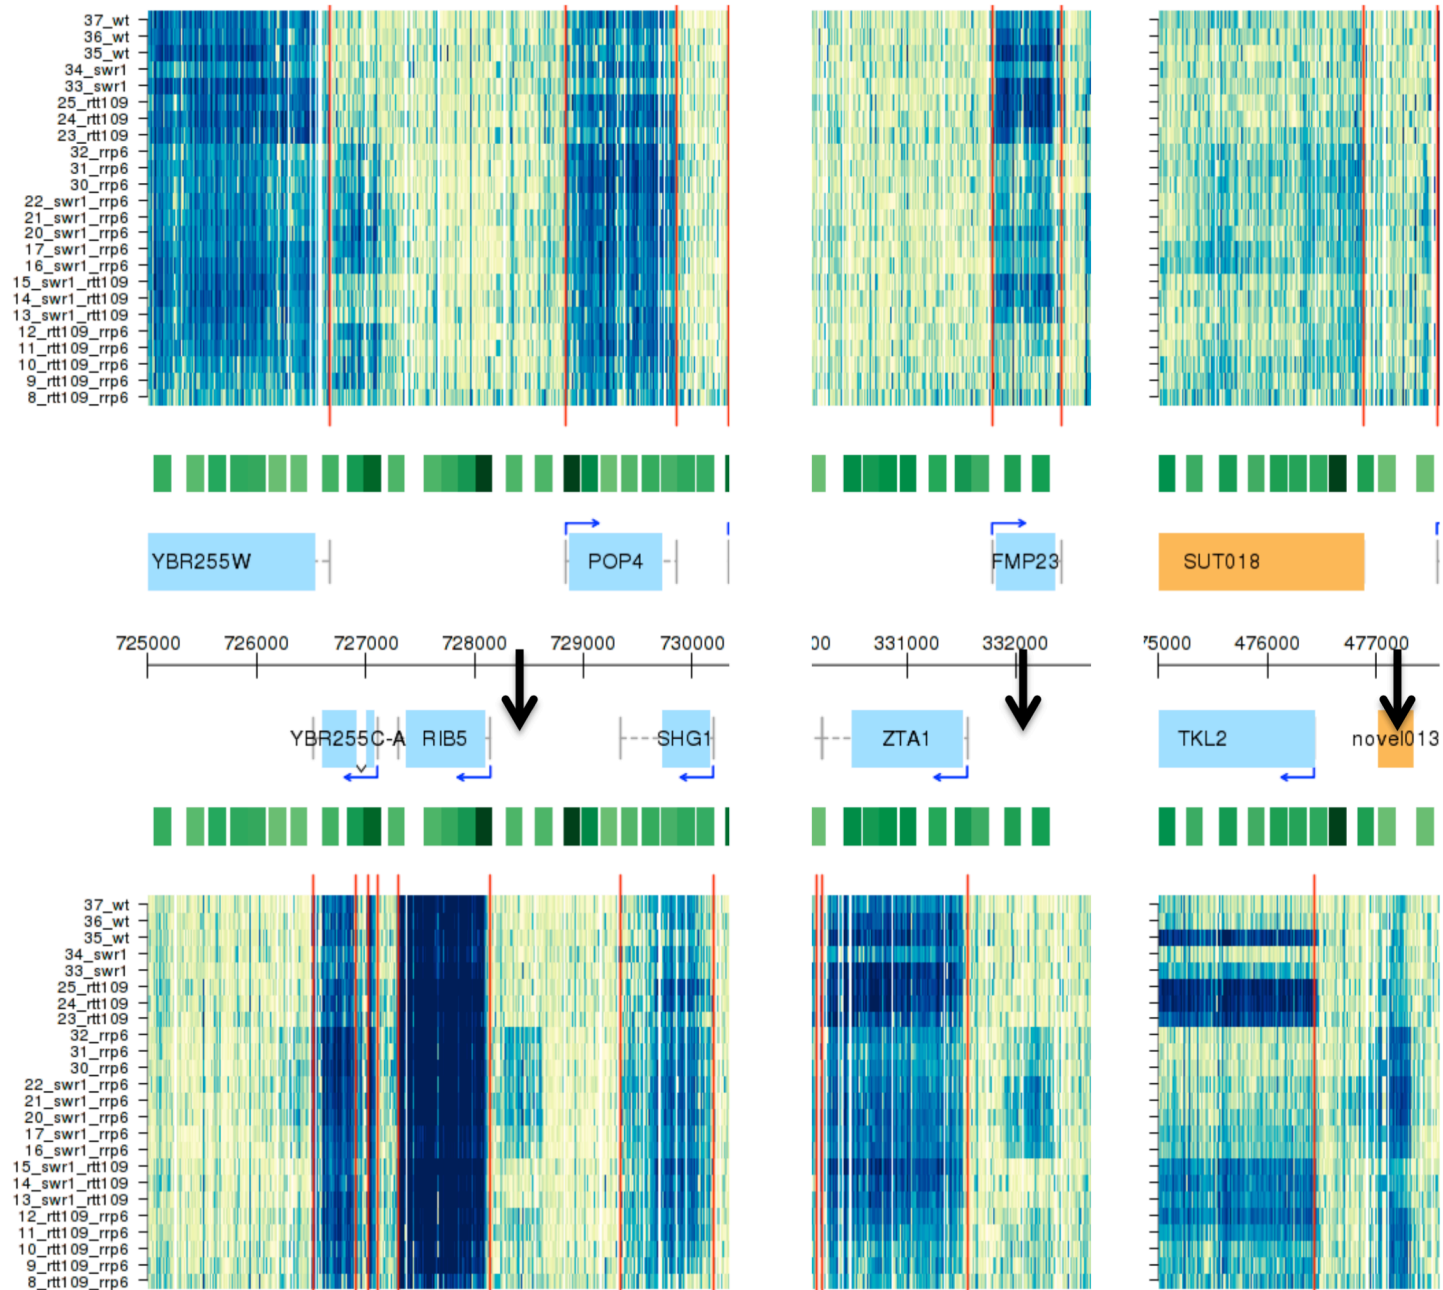

C)

Group B ORFs: Transcriptional interference examples in *rrp6* $\Delta$ 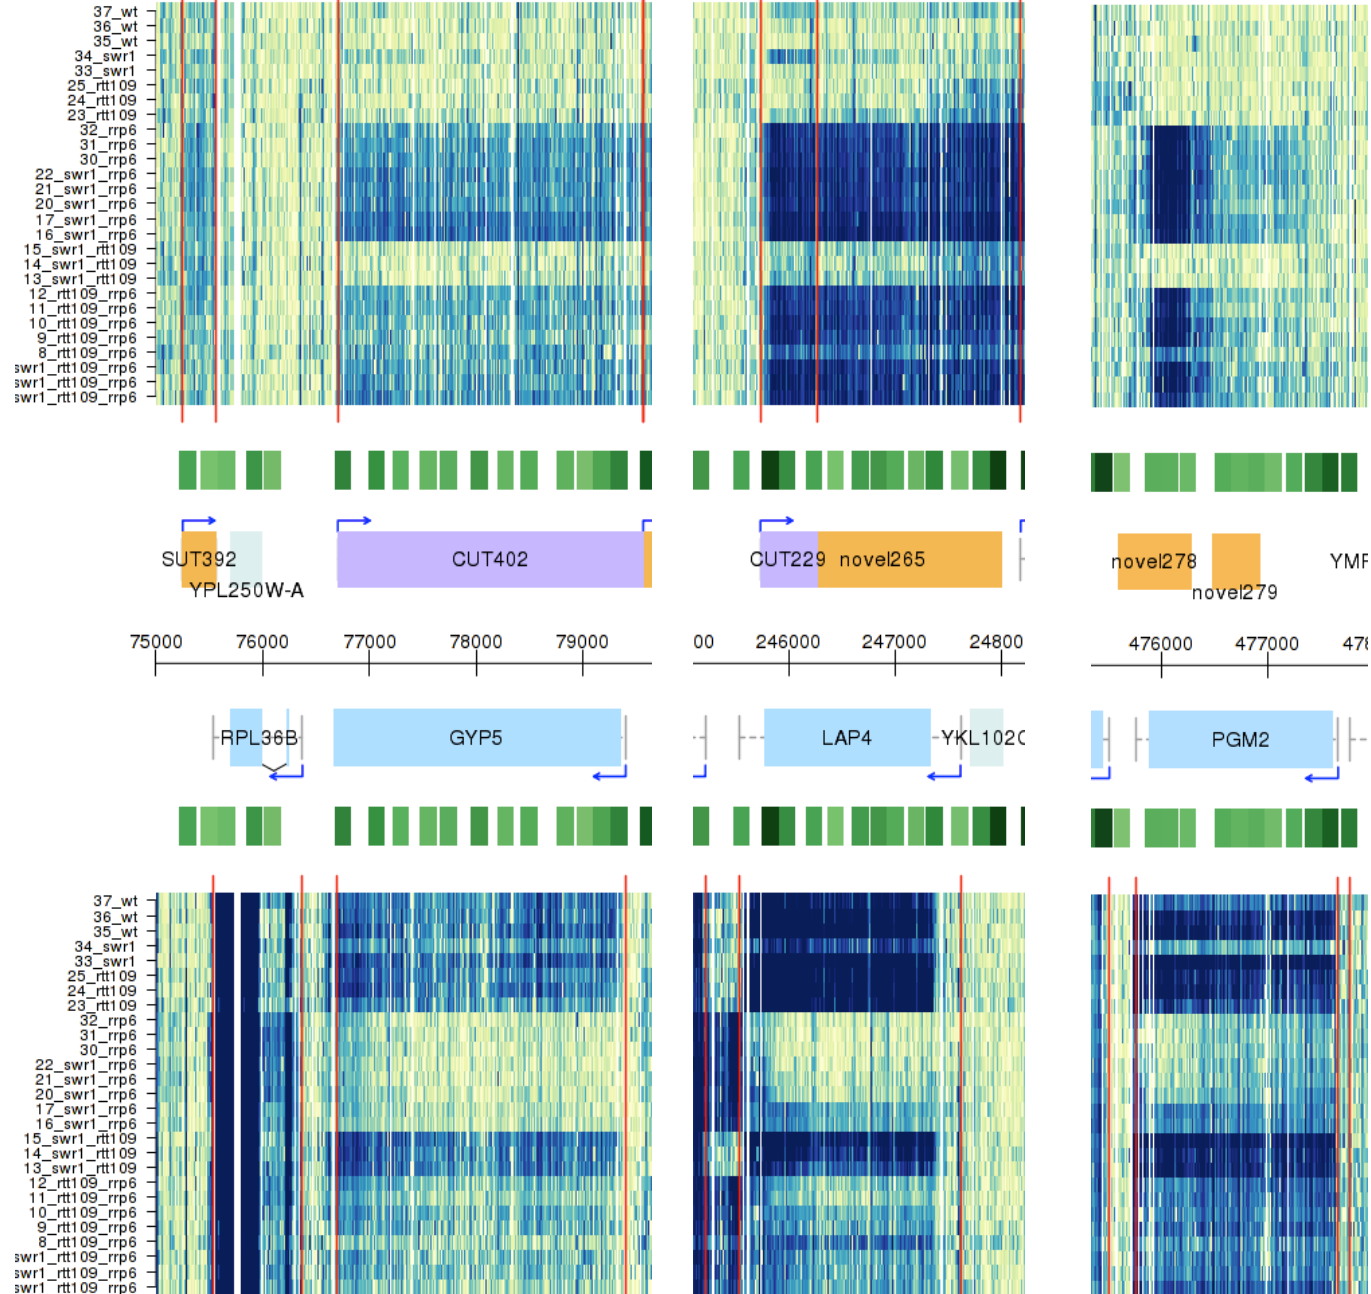

**Supplemental Data S1: Tiling array screenshots of different types of transcripts observed.** A) SRTs enriched in the *swr1Δ rrp6Δ*; B) SWR-C repressed transcripts found in this study (see Figure 4) and C) Transcriptional interference examples from Group B ORFs (see Figure 2C).
