# Supplementary material for: Chromatin Dynamics and the RNA Exosome Function in Concert to Regulate Transcriptional Homeostasis
Source: PubMed Central journal article supplement (PMC4662874; doi:10.1016/j.celrep.2015.10.030), 2015-11-12
Supplement: NIHMS731410-supplement-4.pdf [file NIHMS731410-supplement-4.pdf]

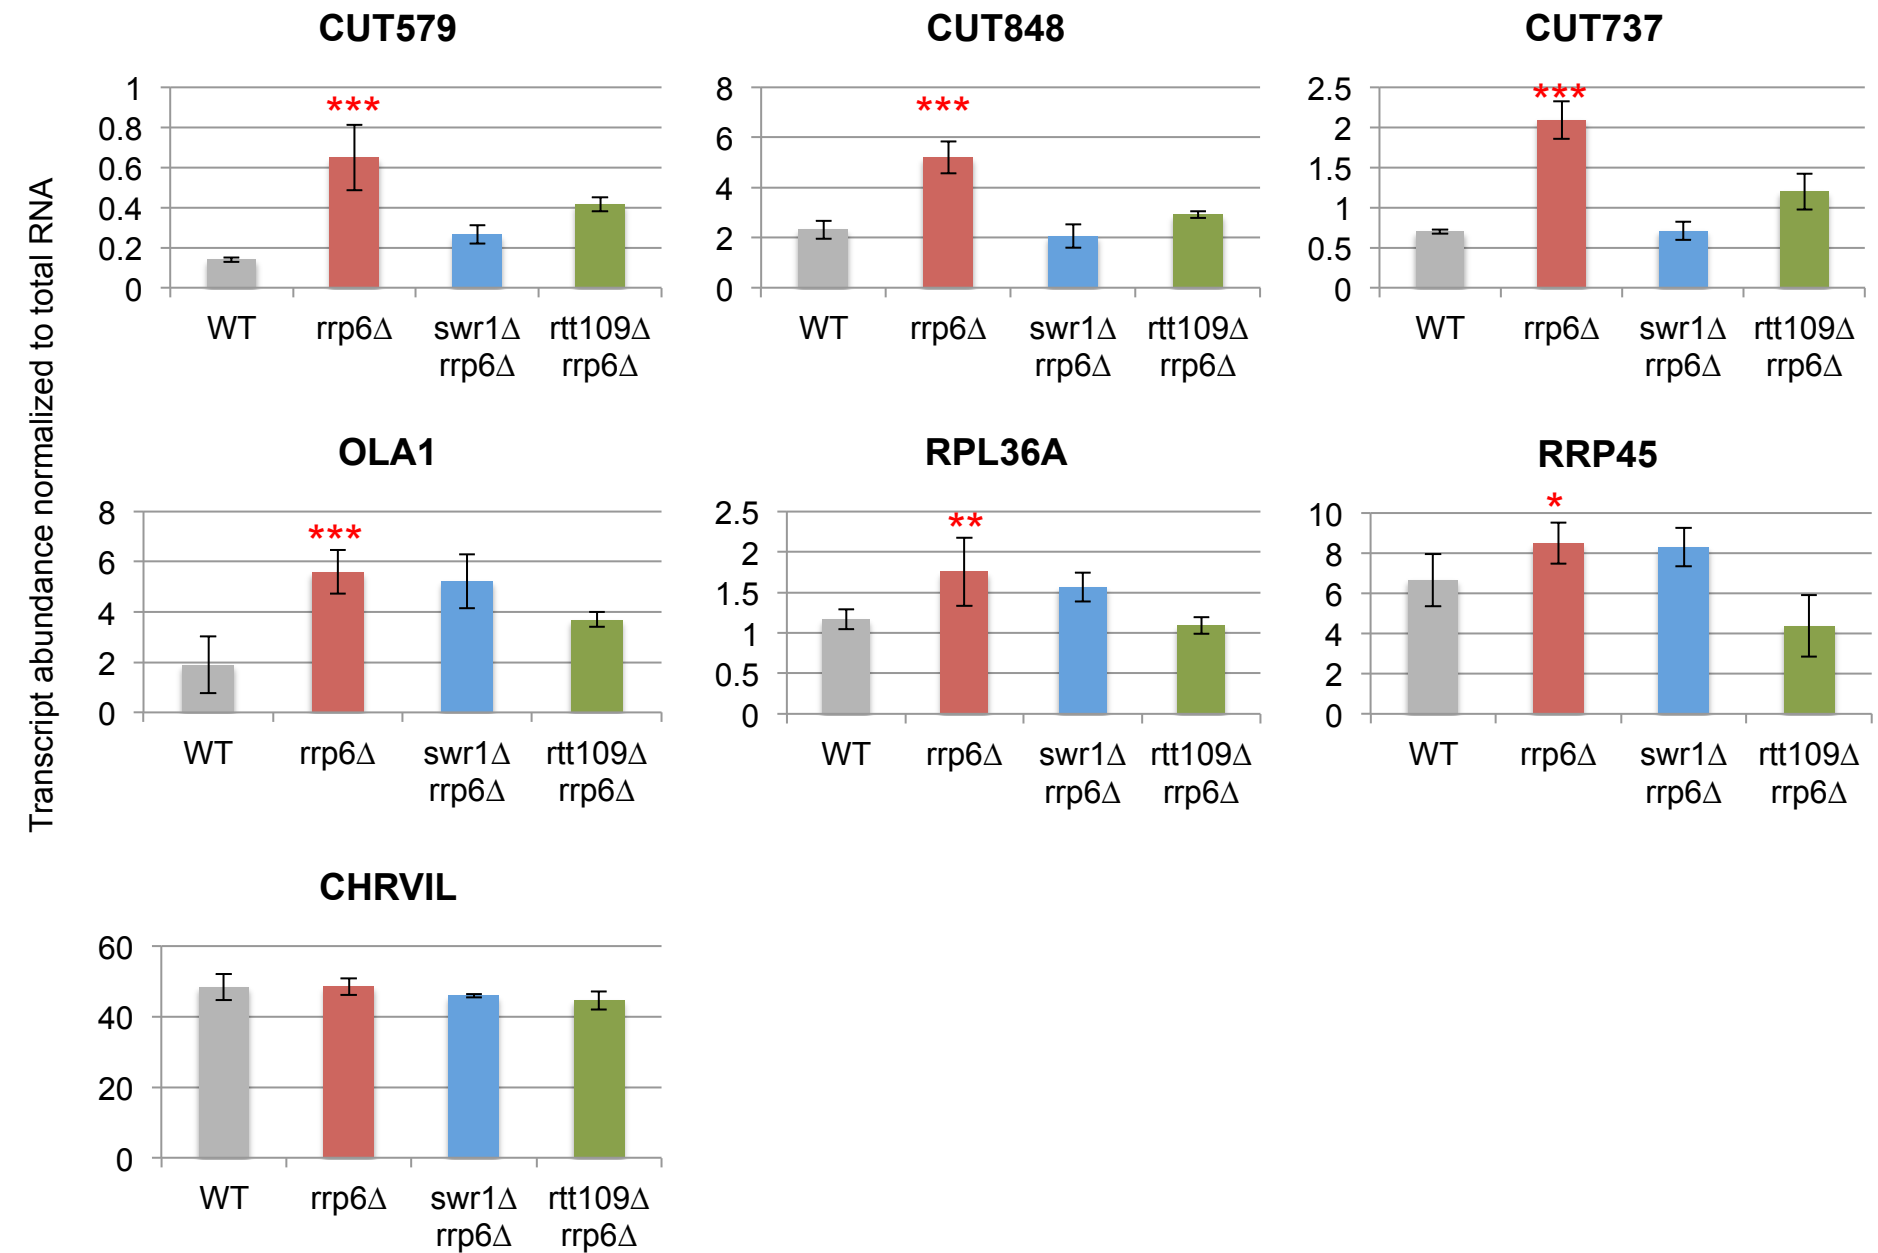

**Supplemental Data S2: qRT-PCR confirmation of yeast tiling array data**

Reverse transcriptase qPCR was performed on total RNA using SyBr Green. Melt curve was performed to ensure primer specificity and relative abundance is plotted for CUTs and ORFs. Error bars represent standard deviations from a triplicate set of experiments and differences tested using Student's T test.
